# Supplementary material for: Private rare deletions in SEC16A and MAMDC4 may represent novel pathogenic variants in familial axial spondyloarthritis
Source: HighWire-hosted journal article supplement (doi:10.1136/annrheumdis-2014-206484), 2015-05-09

Figure S1. Schematic diagram illustrating the exome sequencing pipeline.

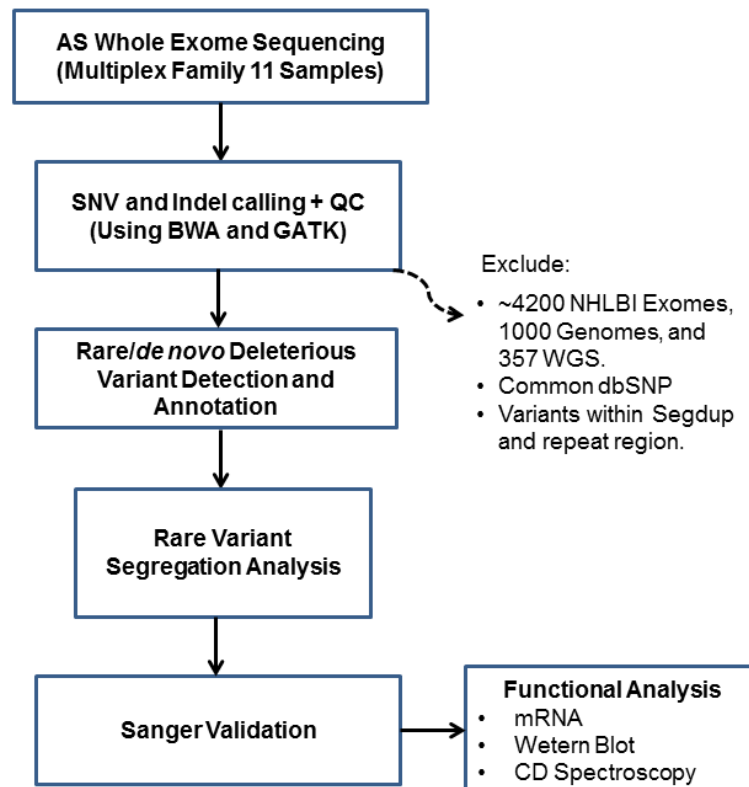

Figure S2. The SEC16A deletion does not affect its expression or co-localization with Sec31A. Immunofluorescent microscopy on acetone fixed cytoprep slides of patient-derived BCL demonstrated no change in Sec16A (green) or Sec31A (red) expression and did not affect their co-localization (merged=yellow). DAPI nuclear stain was used to indicate the juxtannuclear location of Sec16A and Sec31A

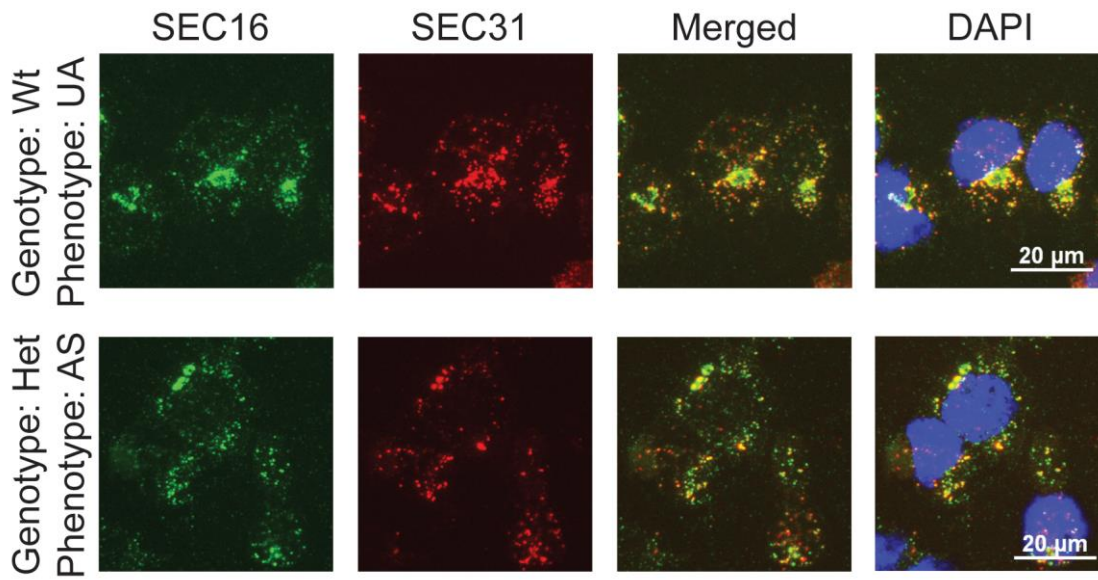

Supplement: annrheumdis-2014-206484supp_figures.pdf [file annrheumdis-2014-206484supp_figures.pdf]
